# Supplementary material for: Riding the wave of innovation: immunoinformatics in fish disease control
Source: PeerJ. 2023 Dec 8;11:e16419. doi: 10.7717/peerj.16419 (PMC10712311; doi:10.7717/peerj.16419)
Supplement: Supplemental Information 1 [file peerj-11-16419-s001.docx]

**Riding the Wave of Innovation: Immunoinformatics in Fish Disease Control**

Siti Aisyah Razali1,2*, Mohd Shahir Shamsir3, Nur Farahin Ishak1, Low Chen Fei4, Wan-Atirah Azemin5*

1Faculty of Science and Marine Environment, Universiti Malaysia Terengganu, 21030 Kuala Nerus, Terengganu, Malaysia

2Biological Security and Sustainability Research Interest Group (BIOSES), Universiti Malaysia Terengganu, 21030 Kuala Nerus, Terengganu, Malaysia.

3Department of Biosciences, Faculty of Science, Universiti Teknologi Malaysia, 81310 Skudai, Johor, Malaysia

4Institute of Systems Biology (INBIOSIS), Universiti Kebangsaan Malaysia, 43600 Bangi, Selangor, Malaysia

5School of Biological Sciences, Universiti Sains Malaysia, 11800 Minden, Pulau Pinang, Malaysia

Corresponding Author:

Siti Aisyah Razali

Faculty of Science and Marine Environment, Universiti Malaysia Terengganu, 21030 Kuala Nerus, Terengganu, Malaysia

Email address: aisyarazali@umt.edu.my

Wan-Atirah Azemin

School of Biological Sciences, Universiti Sains Malaysia, 11800 Minden, Pulau Pinang, Malaysia

Email address: wanatirah@usm.my

**Supplemental file**

**Table 1:** A summary of tools useful in immunoinformatics vaccine design for fish diseases.

| **Application** | **Method** | **Tools/ server** | **URL** |
| --- | --- | --- | --- |
| Epitope Prediction | B-cell prediction | ABCpred | https://webs.iiitd.edu.in/raghava/abcpred/ |
| IEDB B-cell epitope tools | http://tools.iedb.org/bcell/ |
| SVMTriP | http://sysbio.unl.edu/SVMTriP/index.php |
| BCPred | http://ailab-projects1.ist.psu.edu:8080/bcpred/predict.html |
| LBtope | http://crdd.osdd.net/raghava/lbtope/ |
| BepiPred 2.0 | https://services.healthtech.dtu.dk/service.php?BepiPred-2.0 |
| DiscoTope-2.0 | https://services.healthtech.dtu.dk/service.php?DiscoTope-2.0 |
| BEpro | http://pepito.proteomics.ics.uci.edu/ |
| ElliPro | http://tools.iedb.org/ellipro/ |
| EPCES | http://sysbio.unl.edu/EPCES/ |
| EPSVR | http://sysbio.unl.edu/EPSVR/ |
| EPMeta | http://sysbio.unl.edu/EPMeta/ |
| Epitopia | http://epitopia.tau.ac.il/ |
| SEPPA | http://www.badd-cao.net/seppa3/index.html |
| T-cell prediction | IEDB database | http://tools.immuneepitope.org/mhcii/ |
| RANKPEP server | http://imed.med.ucm.es/Tools/rankpep.HTML |
| ProPred | http://crdd.osdd.net/raghava/propred/ |
| NetMHCIIpan- 4.0 | https://services.healthtech.dtu.dk/service.php?NetMHCIIpan-4.0 |
| NetMHCIIpan- 3.2 | https://services.healthtech.dtu.dk/service.php?NetMHCIIpan-3.2 |
| NetCTL-1.2 | https://services.healthtech.dtu.dk/service.php?NetCTL-1.2 |
| ProPred1 | http://crdd.osdd.net/raghava/propred1/ |
| NetMHCpan-4.1 | https://services.healthtech.dtu.dk/service.php?NetMHCpan-4.1 |
| MHCpred 2.0 | http://www.ddg-pharmfac.net/mhcpred/MHCPred/ |
| EpiJen | http://www.ddg-pharmfac.net/epijen/EpiJen/EpiJen.htm |
| CTLPred | http://crdd.osdd.net/raghava/ctlpred/index.html |
| Expitope | http://webclu.bio.wzw.tum.de/expitope/ |
| Construction of multi-epitope vaccine | Adjuvant selection | Vaxjo | http://www.violinet.org/vaxjo/ |
| VaccineDA | https://webs.iiitd.edu.in/raghava/vaccineda/ |
| imRNA | https://webs.iiitd.edu.in/raghava/imrna/ |
| VaxinPAD | https://webs.iiitd.edu.in/raghava/vaxinpad/ |
| Linker selection | Linker DB | https://www.ibi.vu.nl/programs/linkerdbwww/ |
| Structural modeling | EasyModeller 4.0 | https://sites.google.com/site/bioinformatikz/homology-modelling/homology-modelling?authuser=0 |
| SWISS-MODEL | https://swissmodel.expasy.org/ |
| Phyre2 | http://www.sbg.bio.ic.ac.uk/~phyre2/ |
| I-TASSER | https://zhanggroup.org/I-TASSER/ |
| RaptorX | http://raptorx.uchicago.edu/ |
| ROBETTA, | http://robetta.bakerlab.org/ |
| Structure validation | PROCHECK | https://www.ebi.ac.uk/thornton-srv/software/PROCHECK/ |
| Verify3D | https://saves.mbi.ucla.edu |
| ERRAT | https://saves.mbi.ucla.edu |
| Prediction of vaccine antigenicity, allergenicity and toxicity | Antigenicity | VaxiJen 2.0 | http://www.ddg-pharmfac.net/vaxijen/VaxiJen/VaxiJen.html |
| ANTIGENpro | http://scratch.proteomics.ics.uci.edu/ |
| Allergenicity | AllerTOP v 2.0 | http://www.ddg-pharmfac.net/AllerTOP/ |
| AlgPred | https://webs.iiitd.edu.in/raghava/algpred/submission.html |
| AllerCatPro | https://allercatpro.bii.a-star.edu.sg/ |
| Toxicity | ToxinPred | http://crdd.osdd.net/raghava/toxinpred/ |
| T3DB | http://www.t3db.ca/biodb/search/target  _bonds/sequence |
| Physicochemical properties | Protparam | https://web.expasy.org/protparam/ |
| Molecular interaction of immunogenic vaccine | Molecular docking | Autodock Vina | https://vina.scripps.edu/ |
| Autodock 4 | https://autodock.scripps.edu/ |
| ZDOCK | https://zdock.umassmed.edu/ |
| Glide | https://www.schrodinger.com/products/glide |
| GOLD | https://www.ccdc.cam.ac.uk/solutions/csd-discovery/components/gold/ |
| RosettaDock | https://rosie.graylab.jhu.edu/ |
| ClusPro | https://cluspro.org/login.php |
| HADDOCK | https://wenmr.science.uu.nl/haddock2.4/ |
| EpiDOCK | http://www.ddg-pharmfac.net/epidock/EpiDockPage.html |
| Molecular dynamics simulation | GROMACS | https://www.gromacs.org/ |
| CHARMM | https://www.charmm.org/charmm/ |
| AMBER | http://ambermd.org/ |
| NAMD | https://www.ks.uiuc.edu/Research/namd/ |
